# Supplementary material for: The association between different timeframes of air pollution exposure and COVID-19 incidence, morbidity and mortality in German counties in 2020
Source: PubMed Central journal article supplement (PMC11670380; doi:10.1186/s12940-024-01149-0), 2024-12-26
Supplement: 12940_2024_1149_MOESM1_ESM.pdf [file 12940_2024_1149_MOESM1_ESM.pdf]

## Supplement Material

| April - May 2020              |             |           |              |                        | 2010 - 2019                            | 2018 - 2019                          | April - May 2020                       |                                      |                                        |                                      |
|-------------------------------|-------------|-----------|--------------|------------------------|----------------------------------------|--------------------------------------|----------------------------------------|--------------------------------------|----------------------------------------|--------------------------------------|
| COVID-19 Disease Parameters   |             |           |              |                        | Air Pollutants                         |                                      |                                        |                                      |                                        |                                      |
| State                         | Incidence   | Mortality | ICU          | Mechanical ventilation | PM <sub>2.5</sub> (µg/m <sup>3</sup> ) | NO <sub>2</sub> (µg/m <sup>3</sup> ) | PM <sub>2.5</sub> (µg/m <sup>3</sup> ) | NO <sub>2</sub> (µg/m <sup>3</sup> ) | PM <sub>2.5</sub> (µg/m <sup>3</sup> ) | NO <sub>2</sub> (µg/m <sup>3</sup> ) |
| <b>Baden-Württemberg</b>      | 53.6 (39.6) | 2.7 (2.3) | 78.7 (68.9)  | 52.9 (49.6)            | 12.8 (1.3)                             | 19.6 (3.8)                           | 12.1 (1.4)                             | 18.4 (3.7)                           | 8.1 (2.4)                              | 12.3 (5.3)                           |
| <b>Bayern</b>                 | 60.7 (49.1) | 3.8 (5.1) | 90.7 (125.0) | 63.1 (87.0)            | 12.9 (0.6)                             | 18.6 (3.4)                           | 12.5 (0.8)                             | 17.5 (3.8)                           | 8.4 (2.4)                              | 11.2 (4.4)                           |
| <b>Berlin</b>                 | 33.6 (-)    | 1.4 (-)   | 74.3 (-)     | 59.6 (-)               | 16.7 (-)                               | 20.0 (-)                             | 13.7 (-)                               | 18.4 (-)                             | 8.4 (2.6)                              | 13.6 (3.8)                           |
| <b>Brandenburg</b>            | 27.2 (23.1) | 0.9 (1.1) | 27.2 (35.2)  | 12.6 (13.8)            | 14.0 (1.4)                             | 14.0 (3.4)                           | 12.7 (0.8)                             | 12.6 (3.6)                           | 7.4 (2.5)                              | 8.0 (2.8)                            |
| <b>Bremen</b>                 | 82.5 (47.0) | 3.3 (1.5) | 66.4 (53.0)  | 38.5 (25.2)            | 13.4 (0.3)                             | 21.8 (0.4)                           | 12.8 (0.1)                             | 20.0 (0.7)                           | 8.2 (3.2)                              | 13.4 (5.0)                           |
| <b>Hamburg</b>                | 36.4 (-)    | 3.1 (-)   | 82.0 (-)     | 67.5 (-)               | 14.1 (-)                               | 23.5 (-)                             | 12.9 (-)                               | 22.9 (-)                             | 8.1 (2.8)                              | 16.9 (4.7)                           |
| <b>Hessen</b>                 | 39.3 (33.4) | 2.0 (3.4) | 56.5 (44.1)  | 40.8 (35.7)            | 13.2 (0.5)                             | 18.2 (6.1)                           | 12.4 (0.9)                             | 16.9 (6.5)                           | 8.3 (2.6)                              | 11.8 (6.7)                           |
| <b>Mecklenburg-Vorpommern</b> | 6.1 (2.9)   | 0.1 (0.3) | 6.1 (8.1)    | 3.7 (5.3)              | 12.6 (0.4)                             | 10.5 (4.4)                           | 12.0 (0.8)                             | 10.0 (4.4)                           | 7.1 (3.3)                              | 6.6 (4.0)                            |
| <b>Niedersachsen</b>          | 21.1 (18.6) | 1.3 (2.0) | 27.1 (31.9)  | 18.3 (25.2)            | 12.6 (0.8)                             | 15.6 (3.0)                           | 12.2 (0.9)                             | 14.6 (2.8)                           | 8.0 (2.3)                              | 9.6 (3.5)                            |
| <b>Nordrhein-Westfalen</b>    | 42.0 (26.1) | 1.9 (2.1) | 47.1 (31.1)  | 34.2 (26.9)            | 14.0 (1.3)                             | 21.9 (4.4)                           | 13.3 (1.5)                             | 20.8 (4.8)                           | 9.4 (3.1)                              | 15.9 (7.2)                           |
| <b>Rheinland-Pfalz</b>        | 23.6 (20.2) | 1.2 (1.7) | 36.8 (47.4)  | 23.7 (36.5)            | 12.9 (1.1)                             | 17.1 (5.4)                           | 12.3 (1.1)                             | 15.8 (5.5)                           | 8.6 (2.6)                              | 11.1 (5.6)                           |
| <b>Saarland</b>               | 31.8 (11.8) | 2.7 (3.0) | 46.2 (39.0)  | 21.4 (17.7)            | 13.1 (0.5)                             | 17.7 (2.5)                           | 12.5 (0.7)                             | 16.3 (2.6)                           | 8.3 (2.3)                              | 11.0 (3.3)                           |
| <b>Sachsen</b>                | 23.3 (19.3) | 1.1 (1.6) | 39.5 (64.1)  | 23.0 (30.7)            | 13.5 (1.0)                             | 16.4 (3.8)                           | 12.7 (1.3)                             | 13.9 (3.9)                           | 8.0 (2.3)                              | 9.6 (3.7)                            |
| <b>Sachsen-Anhalt</b>         | 14.8 (13.4) | 0.6 (1.1) | 17.7 (21.9)  | 10.0 (15.3)            | 13.7 (1.2)                             | 15.8 (3.3)                           | 12.5 (0.9)                             | 14.4 (3.6)                           | 8.1 (2.6)                              | 10.2 (3.8)                           |

| April - May 2020            |                    |                  |                    |                        | 2010 - 2019                            | 2018 - 2019                          | April - May 2020                       |                                      |                                        |                                      |
|-----------------------------|--------------------|------------------|--------------------|------------------------|----------------------------------------|--------------------------------------|----------------------------------------|--------------------------------------|----------------------------------------|--------------------------------------|
| COVID-19 Disease Parameters |                    |                  |                    |                        | Air Pollutants                         |                                      |                                        |                                      |                                        |                                      |
| State                       | Incidence          | Mortality        | ICU                | Mechanical ventilation | PM <sub>2.5</sub> (µg/m <sup>3</sup> ) | NO <sub>2</sub> (µg/m <sup>3</sup> ) | PM <sub>2.5</sub> (µg/m <sup>3</sup> ) | NO <sub>2</sub> (µg/m <sup>3</sup> ) | PM <sub>2.5</sub> (µg/m <sup>3</sup> ) | NO <sub>2</sub> (µg/m <sup>3</sup> ) |
| Schleswig-Holstein          | 19.7 (18.4)        | 0.7 (1.4)        | 13.5 (13.1)        | 10.0 (10.5)            | 12.6 (0.8)                             | 14.7 (3.4)                           | 12.6 (1.1)                             | 13.8 (3.7)                           | 8.1 (2.6)                              | 10.8 (5.0)                           |
| Thüringen                   | 48.3 (75.5)        | 3.8 (7.8)        | 53.1 (64.6)        | 37.5 (49.6)            | 12.7 (1.2)                             | 15.7 (4.5)                           | 12.1 (1.3)                             | 14.3 (4.3)                           | 8.6 (2.6)                              | 9.9 (3.7)                            |
| <b>Total</b>                | <b>40.3 (40.4)</b> | <b>2.2 (3.7)</b> | <b>54.4 (76.2)</b> | <b>37.1 (54.0)</b>     | <b>13.1 (1.1)</b>                      | <b>17.8 (4.7)</b>                    | <b>12.5 (1.1)</b>                      | <b>16.6 (4.9)</b>                    | <b>9.8 (4.3)</b>                       | <b>12.6 (6.0)</b>                    |

**Table S1:** Disease outcomes and air pollution levels by state. All disease parameters are given as means per 100,000 residents for the entire period April 16<sup>th</sup> – May 16<sup>th</sup> 2020. PM<sub>2.5</sub> and NO<sub>2</sub> levels are provided as means of the annual means for the periods 2010 – 2019 and 2018 – 2019. For the period April 16<sup>th</sup> – May 16<sup>th</sup> 2020, the means of the 48-hour means per county were calculated. Standard deviations for all parameters are given in parentheses.

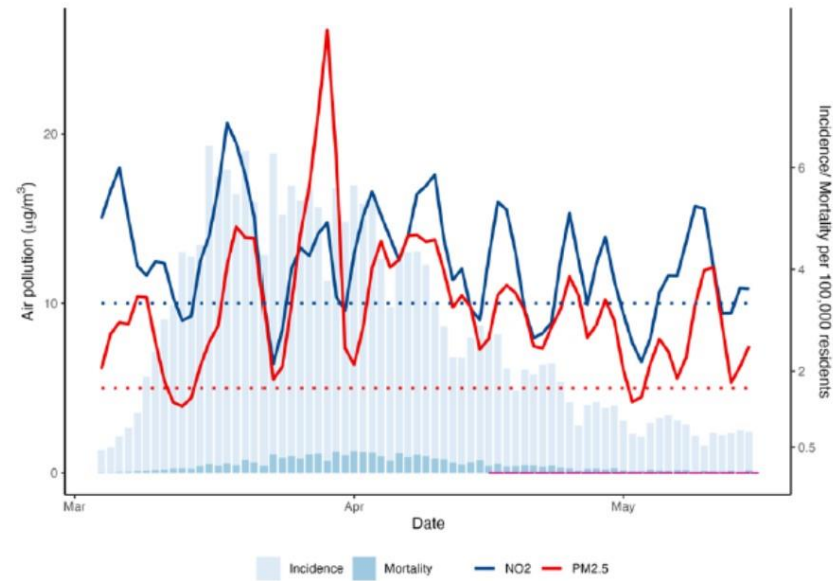

**Figure 3:** Incidence and mortality and NO<sub>2</sub>-levels and PM<sub>2.5</sub>-levels over time in March – May 2020. Pollution variables for a given date are given as average of the previous 48 hours. The dashed colored lines are WHO-recommended thresholds annual average levels of NO<sub>2</sub> and PM<sub>2.5</sub>. The pink line indicates the period for which data is available in the DIVI-register.

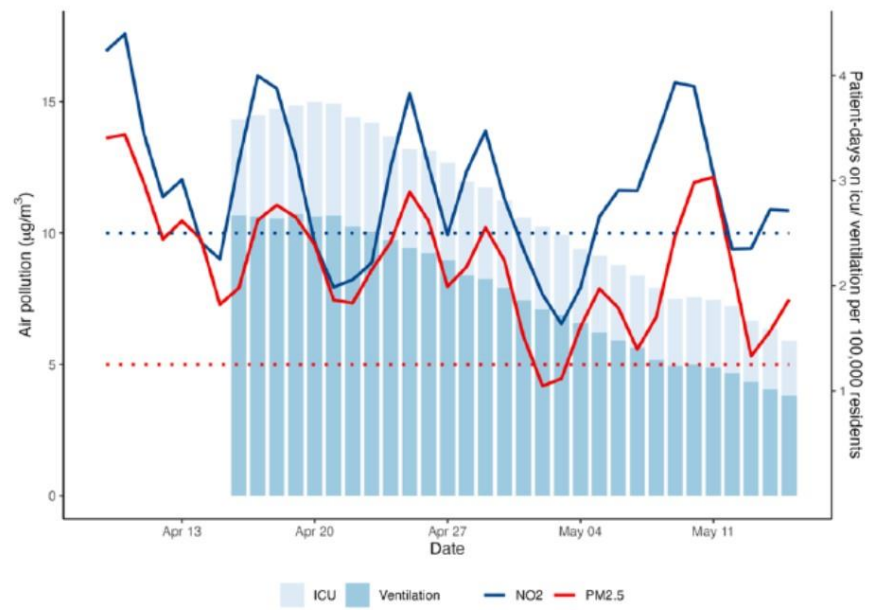

**Figure 4:** Patient-days on ICU and on mechanical ventilation and NO<sub>2</sub>-levels and PM<sub>2.5</sub>-levels over time in April – May 2020. The dashed colored lines are WHO-recommended thresholds for annual average levels of NO<sub>2</sub> and PM<sub>2.5</sub>.

COVID-19 Disease Parameters

Air Pollutants

| State                  | April - May 2020   |                  |                    | 2010 - 2019            |                                        |                                      | 2018 - 2019                            |                                      |                                        | April - May 2020                     |                                        |                                      |
|------------------------|--------------------|------------------|--------------------|------------------------|----------------------------------------|--------------------------------------|----------------------------------------|--------------------------------------|----------------------------------------|--------------------------------------|----------------------------------------|--------------------------------------|
|                        | Incidence          | Mortality        | ICU                | Mechanical ventilation | PM <sub>2.5</sub> (µg/m <sup>3</sup> ) | NO <sub>2</sub> (µg/m <sup>3</sup> ) | PM <sub>2.5</sub> (µg/m <sup>3</sup> ) | NO <sub>2</sub> (µg/m <sup>3</sup> ) | PM <sub>2.5</sub> (µg/m <sup>3</sup> ) | NO <sub>2</sub> (µg/m <sup>3</sup> ) | PM <sub>2.5</sub> (µg/m <sup>3</sup> ) | NO <sub>2</sub> (µg/m <sup>3</sup> ) |
| Baden-Württemberg      | 53.6 (39.6)        | 2.7 (2.3)        | 78.7 (68.9)        | 52.9 (49.6)            | 12.8 (1.3)                             | 19.6 (3.8)                           | 12.1 (1.4)                             | 18.4 (3.7)                           | 8.1 (2.4)                              | 18.4 (3.7)                           | 8.1 (2.4)                              | 12.3 (5.3)                           |
| Bayern                 | 60.7 (49.1)        | 3.8 (5.1)        | 90.7 (125.0)       | 63.1 (87.0)            | 12.9 (0.6)                             | 18.6 (3.4)                           | 12.5 (0.8)                             | 17.5 (3.8)                           | 8.4 (2.4)                              | 17.5 (3.8)                           | 8.4 (2.4)                              | 11.2 (4.4)                           |
| Berlin                 | 33.6 (-)           | 1.4 (-)          | 74.3 (-)           | 59.6 (-)               | 16.7 (-)                               | 20.0 (-)                             | 13.7 (-)                               | 18.4 (-)                             | 8.4 (2.6)                              | 18.4 (-)                             | 8.4 (2.6)                              | 13.6 (3.8)                           |
| Brandenburg            | 27.2 (23.1)        | 0.9 (1.1)        | 27.2 (35.2)        | 12.6 (13.8)            | 14.0 (1.4)                             | 14.0 (3.4)                           | 12.7 (0.8)                             | 12.6 (3.6)                           | 7.4 (2.5)                              | 12.6 (3.6)                           | 7.4 (2.5)                              | 8.0 (2.8)                            |
| Bremen                 | 82.5 (47.0)        | 3.3 (1.5)        | 66.4 (53.0)        | 38.5 (25.2)            | 13.4 (0.3)                             | 21.8 (0.4)                           | 12.8 (0.1)                             | 20.0 (0.7)                           | 8.2 (3.2)                              | 20.0 (0.7)                           | 8.2 (3.2)                              | 13.4 (5.0)                           |
| Hamburg                | 36.4 (-)           | 3.1 (-)          | 82.0 (-)           | 67.5 (-)               | 14.1 (-)                               | 23.5 (-)                             | 12.9 (-)                               | 22.9 (-)                             | 8.1 (2.8)                              | 22.9 (-)                             | 8.1 (2.8)                              | 16.9 (4.7)                           |
| Hessen                 | 39.3 (33.4)        | 2.0 (3.4)        | 56.5 (44.1)        | 40.8 (35.7)            | 13.2 (0.5)                             | 18.2 (6.1)                           | 12.4 (0.9)                             | 16.9 (6.5)                           | 8.3 (2.6)                              | 16.9 (6.5)                           | 8.3 (2.6)                              | 11.8 (6.7)                           |
| Mecklenburg-Vorpommern | 6.1 (2.9)          | 0.1 (0.3)        | 6.1 (8.1)          | 3.7 (5.3)              | 12.6 (0.4)                             | 10.5 (4.4)                           | 12.0 (0.8)                             | 10.0 (4.4)                           | 7.1 (3.3)                              | 10.0 (4.4)                           | 7.1 (3.3)                              | 6.6 (4.0)                            |
| Niedersachsen          | 21.1 (18.6)        | 1.3 (2.0)        | 27.1 (31.9)        | 18.3 (25.2)            | 12.6 (0.8)                             | 15.6 (3.0)                           | 12.2 (0.9)                             | 14.6 (2.8)                           | 8.0 (2.3)                              | 14.6 (2.8)                           | 8.0 (2.3)                              | 9.6 (3.5)                            |
| Nordrhein-Westfalen    | 42.0 (26.1)        | 1.9 (2.1)        | 47.1 (31.1)        | 34.2 (26.9)            | 14.0 (1.3)                             | 21.9 (4.4)                           | 13.3 (1.5)                             | 20.8 (4.8)                           | 9.4 (3.1)                              | 20.8 (4.8)                           | 9.4 (3.1)                              | 15.9 (7.2)                           |
| Rheinland-Pfalz        | 23.6 (20.2)        | 1.2 (1.7)        | 36.8 (47.4)        | 23.7 (36.5)            | 12.9 (1.1)                             | 17.1 (5.4)                           | 12.3 (1.1)                             | 15.8 (5.5)                           | 8.6 (2.6)                              | 15.8 (5.5)                           | 8.6 (2.6)                              | 11.1 (5.6)                           |
| Rheinland              | 31.8 (11.8)        | 2.7 (3.0)        | 46.2 (39.0)        | 21.4 (17.7)            | 13.1 (0.5)                             | 17.7 (2.5)                           | 12.5 (0.7)                             | 16.3 (2.6)                           | 8.3 (2.3)                              | 16.3 (2.6)                           | 8.3 (2.3)                              | 11.0 (3.3)                           |
| Sachsen                | 23.3 (19.3)        | 1.1 (1.6)        | 39.5 (64.1)        | 23.0 (30.7)            | 13.5 (1.0)                             | 16.4 (3.8)                           | 12.7 (1.3)                             | 13.9 (3.9)                           | 8.0 (2.3)                              | 13.9 (3.9)                           | 8.0 (2.3)                              | 9.6 (3.7)                            |
| Sachsen-Anhalt         | 14.8 (13.4)        | 0.6 (1.1)        | 17.7 (21.9)        | 10.0 (15.3)            | 13.7 (1.2)                             | 15.8 (3.3)                           | 12.5 (0.9)                             | 14.4 (3.6)                           | 8.1 (2.6)                              | 14.4 (3.6)                           | 8.1 (2.6)                              | 10.2 (3.8)                           |
| Schleswig-Holstein     | 19.7 (18.4)        | 0.7 (1.4)        | 13.5 (13.1)        | 10.0 (10.5)            | 12.6 (0.8)                             | 14.7 (3.4)                           | 12.6 (1.1)                             | 13.8 (3.7)                           | 8.1 (2.6)                              | 13.8 (3.7)                           | 8.1 (2.6)                              | 10.8 (5.0)                           |
| Thüringen              | 48.3 (73.5)        | 3.8 (7.8)        | 53.1 (64.6)        | 37.5 (49.6)            | 12.7 (1.2)                             | 15.7 (4.5)                           | 12.1 (1.3)                             | 14.3 (4.3)                           | 8.6 (2.6)                              | 14.3 (4.3)                           | 8.6 (2.6)                              | 9.9 (3.7)                            |
| <b>Total</b>           | <b>40.3 (40.4)</b> | <b>2.2 (3.7)</b> | <b>54.4 (76.2)</b> | <b>37.1 (54.0)</b>     | <b>13.1 (1.1)</b>                      | <b>17.8 (4.7)</b>                    | <b>12.5 (1.1)</b>                      | <b>16.6 (4.9)</b>                    | <b>9.8 (4.3)</b>                       | <b>16.6 (4.9)</b>                    | <b>9.8 (4.3)</b>                       | <b>12.6 (6.0)</b>                    |

**Table S1:** Disease outcomes and air pollution levels by state. All disease parameters are given as means per 100,000 residents for the entire period April 16<sup>th</sup> – May 16<sup>th</sup> 2020. PM<sub>2.5</sub> and NO<sub>2</sub> levels are provided as means of the annual means for the periods 2010 – 2019 and 2018 – 2019. For the period April 16<sup>th</sup> – May 16<sup>th</sup> 2020, the means of the 48-hour means per county were calculated. Standard deviations for all parameters are given in parentheses.
